# Supplementary material for: Sec13 Regulates Expression of Specific Immune Factors Involved in Inflammation In Vivo
Source: PubMed Central journal article supplement (PMC4668385; doi:10.1038/srep17655), 2015-12-03
Supplement: srep17655-s1.pdf [file srep17655-s1.pdf]

## **Sec13 Regulates Expression of Specific Immune Factors Involved in Inflammation *In Vivo***

Thais G. Moreira<sup>1,4,7</sup>, Liang Zhang<sup>1,7,8</sup>, Lihi Shaulov<sup>5,9</sup>, Amnon Harel<sup>5</sup>, Sharon K. Kuss<sup>1</sup>,  
<sup>2</sup>Jessica Williams, <sup>2</sup>John Shelton, Bandarigoda Somatilaka<sup>1</sup>, Joachim Seemann<sup>1</sup>, Jue Yang<sup>1</sup>,  
Ramanavelan Sakthivel<sup>1</sup>, Daniel R. Nussenzveig<sup>3,6</sup>, Ana M.C. Faria<sup>4\*</sup>, and Beatriz M.A. Fontoura<sup>1\*</sup>

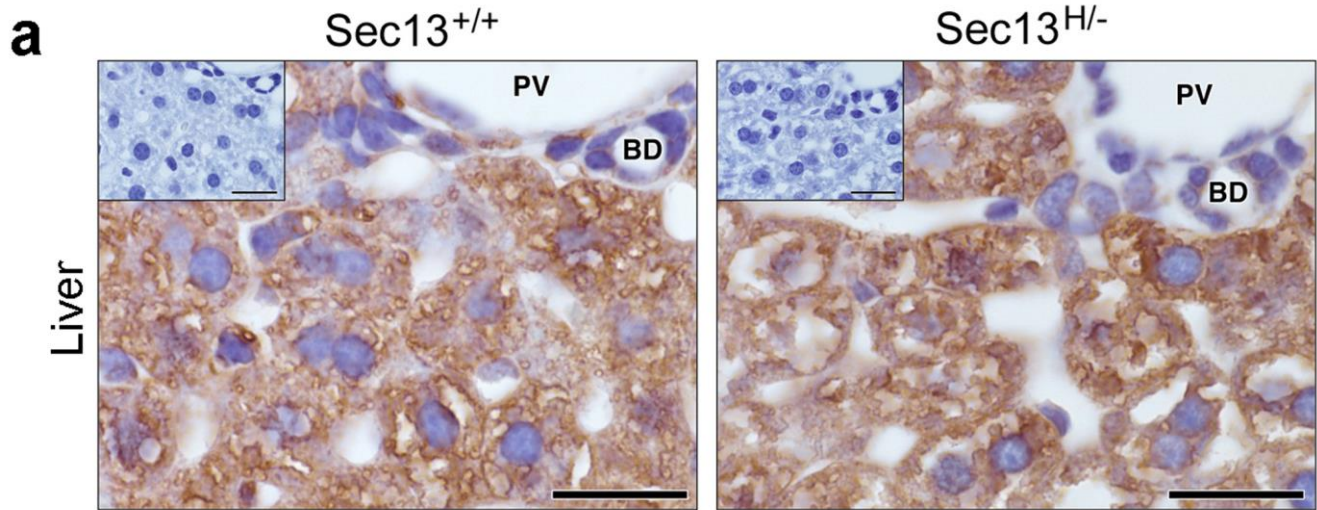

**b**

|                        | Sec13 <sup>+/+</sup> | Sec13 <sup>H/-</sup> |
|------------------------|----------------------|----------------------|
| <b>Albumin</b>         | 2.2g/dL ± 0.17       | 2.06g/dL ± 0.2       |
| <b>Total Bilirubin</b> | 0.63mg/dL ± 0.49     | 0.46mg/dL ± 0.46     |
| <b>Cholesterol</b>     | 73mg/dL ± 5.29       | 58.33mg/dL ± 10.01   |

**Supplementary Figure 1. ER Staining in the Liver and Serum Levels of Liver Factors from Sec13<sup>+/+</sup> and Sec13<sup>H/-</sup> mice.** (a) Immunohistochemistry for protein disulfide-isomerase (PDI). High magnification bright-field microscopy of PDI immunoperoxidase localization in wild-type and mutant liver. Boundaries of hepatocyte endoplasmic reticulum are defined by PDI staining (brown) in the liver of wild-type and mutant mice. Hematoxylin counter stain is blue/purple and inset micrographs show absence of staining in matching-anatomy from adjacent sections not subjected to primary antibody. PV, hepatic portal vein; BD, bile duct; bars, 20µm. (b) Liver bulk secretory function was assessed by measuring serum levels of albumin, bilirubin, and cholesterol using the VITROS-25 system. The levels of these factors are not statistically different between Sec13<sup>+/+</sup> and Sec13<sup>H/-</sup> mice.

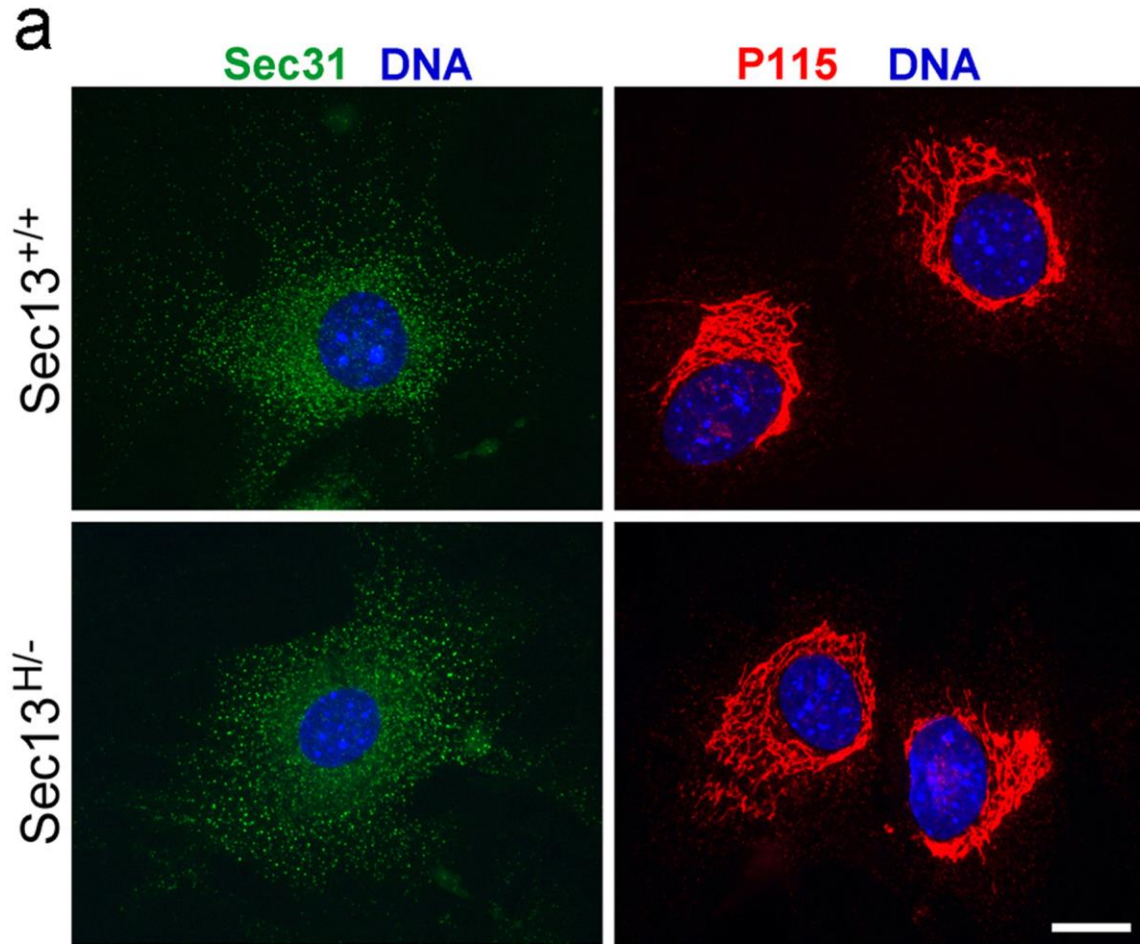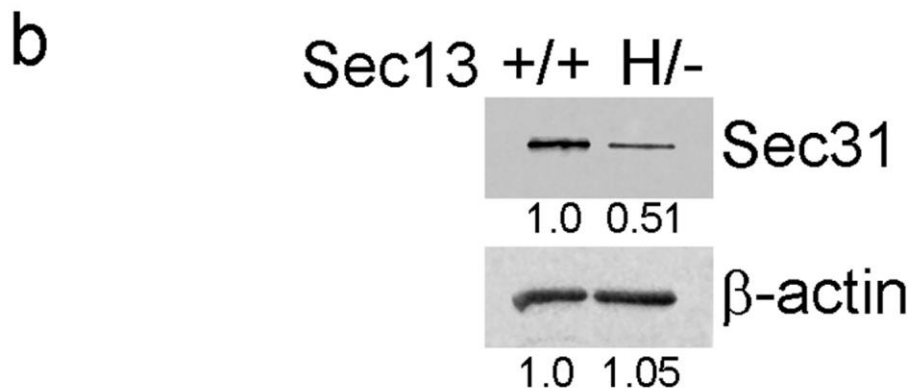

**Supplementary Figure 2. Morphology of ER Exit Sites and Golgi from Sec13<sup>+/+</sup> and Sec13<sup>H/-</sup> mice.** (a) Lung Fibroblasts from Sec13<sup>+/+</sup> and Sec13<sup>H/-</sup> mice were subjected to immunofluorescence microscopy for staining Sec31, to label ER exit sites (green), and the peripheral Golgi protein p115 (red). DNA is stained with Hoechst (blue). Bar, 20µm. (b) Immunoblot analysis of extracts from Sec13<sup>+/+</sup> and Sec13<sup>H/-</sup> lung fibroblasts was performed using antibodies against the depicted proteins. Immunoblots were quantified by ImageJ software.

| Genotype             | Cytokine | Treatment | Time (hours post-plating) | mRNA expression relative to wild-type (+/- standard deviation) | p value |
|----------------------|----------|-----------|---------------------------|----------------------------------------------------------------|---------|
| Sec13 <sup>+/+</sup> | IL-6     | -         | 0                         | 1.00 ± 0.83                                                    |         |
| Sec13 <sup>H/-</sup> | IL-6     | -         | 0                         | 0.60 ± 0.20                                                    | 0.47    |
| Sec13 <sup>+/+</sup> | IL-6     | ConA      | 5                         | 1.00 ± 0.54                                                    |         |
| Sec13 <sup>H/-</sup> | IL-6     | ConA      | 5                         | 1.49 ± 0.24                                                    | 0.22    |
| Sec13 <sup>+/+</sup> | IL-6     | ConA      | 24                        | 1.00 ± 0.20                                                    |         |
| Sec13 <sup>H/-</sup> | IL-6     | ConA      | 24                        | 0.80 ± 0.16                                                    | 0.25    |
| Sec13 <sup>+/+</sup> | IL-6     | ConA      | 48                        | 1.00 ± 0.20                                                    |         |
| Sec13 <sup>H/-</sup> | IL-6     | ConA      | 48                        | 1.15 ± 0.27                                                    | 0.47    |
| Sec13 <sup>+/+</sup> | IL-6     | -         | 48                        | 1.00 ± 0.24                                                    |         |
| Sec13 <sup>H/-</sup> | IL-6     | -         | 48                        | 1.77 ± 0.61                                                    | 0.11    |
|                      |          |           |                           |                                                                |         |
| Sec13 <sup>+/+</sup> | IFN-γ    | -         | 0                         | 1.00 ± 1.13                                                    |         |
| Sec13 <sup>H/-</sup> | IFN-γ    | -         | 0                         | 0.27 ± 0.07                                                    | 0.33    |
| Sec13 <sup>+/+</sup> | IFN-γ    | ConA      | 5                         | 1.00 ± 0.41                                                    |         |
| Sec13 <sup>H/-</sup> | IFN-γ    | ConA      | 5                         | 1.08 ± 0.12                                                    | 0.78    |
| Sec13 <sup>+/+</sup> | IFN-γ    | ConA      | 24                        | 1.00 ± 0.36                                                    |         |
| Sec13 <sup>H/-</sup> | IFN-γ    | ConA      | 24                        | 0.68 ± 0.09                                                    | 0.21    |
| Sec13 <sup>+/+</sup> | IFN-γ    | ConA      | 48                        | 1.71 ± 1.49                                                    |         |
| Sec13 <sup>H/-</sup> | IFN-γ    | ConA      | 48                        | 1.36 ± 0.81                                                    | 0.44    |
| Sec13 <sup>+/+</sup> | IFN-γ    | -         | 48                        | 1.00 ± 0.53                                                    |         |
| Sec13 <sup>H/-</sup> | IFN-γ    | -         | 48                        | 0.74 ± 0.26                                                    | 0.15    |
|                      |          |           |                           |                                                                |         |
| Sec13 <sup>+/+</sup> | TGF-β    | -         | 0                         | 1.00 ± 0.47                                                    |         |
| Sec13 <sup>H/-</sup> | TGF-β    | -         | 0                         | 1.67 ± 0.25                                                    | 0.10    |
| Sec13 <sup>+/+</sup> | TGF-β    | ConA      | 5                         | 1.00 ± 0.43                                                    |         |
| Sec13 <sup>H/-</sup> | TGF-β    | ConA      | 5                         | 1.77* ± 0.24                                                   | 0.05    |
| Sec13 <sup>+/+</sup> | TGF-β    | ConA      | 24                        | 1.00 ± 1.12                                                    |         |
| Sec13 <sup>H/-</sup> | TGF-β    | ConA      | 24                        | 1.21 ± 0.35                                                    | 0.77    |
| Sec13 <sup>+/+</sup> | TGF-β    | ConA      | 48                        | 1.00 ± 0.11                                                    |         |
| Sec13 <sup>H/-</sup> | TGF-β    | ConA      | 48                        | 0.88 ± 0.07                                                    | 0.02    |
| Sec13 <sup>+/+</sup> | TGF-β    | -         | 48                        | 1.00 ± 0.09                                                    |         |
| Sec13 <sup>H/-</sup> | TGF-β    | -         | 48                        | 0.91 ± 0.14                                                    | 0.12    |
|                      |          |           |                           |                                                                |         |
| Sec13 <sup>+/+</sup> | IL-10    | -         | 0                         | 1.00 ± 0.80                                                    |         |
| Sec13 <sup>H/-</sup> | IL-10    | -         | 0                         | 0.55 ± 0.19                                                    | 0.40    |
| Sec13 <sup>+/+</sup> | IL-10    | ConA      | 5                         | 1.00 ± 0.69                                                    |         |
| Sec13 <sup>H/-</sup> | IL-10    | ConA      | 5                         | 1.37 ± 0.16                                                    | 0.41    |
| Sec13 <sup>+/+</sup> | IL-10    | ConA      | 24                        | 1.00 ± 0.18                                                    |         |
| Sec13 <sup>H/-</sup> | IL-10    | ConA      | 24                        | 0.98 ± 0.11                                                    | 0.87    |
| Sec13 <sup>+/+</sup> | IL-10    | ConA      | 48                        | 1.00 ± 0.14                                                    |         |
| Sec13 <sup>H/-</sup> | IL-10    | ConA      | 48                        | 0.99 ± 0.12                                                    | 0.90    |
| Sec13 <sup>+/+</sup> | IL-10    | -         | 48                        | 1.00 ± 0.16                                                    |         |
| Sec13 <sup>H/-</sup> | IL-10    | -         | 48                        | 1.21 ± 0.24                                                    | 0.28    |

**Supplementary Figure 3. mRNA Levels of Cytokines from Sec13<sup>+/+</sup> and Sec13<sup>H/-</sup> mice.** Cells were isolated from spleen of Sec13<sup>+/+</sup> or Sec13<sup>H/-</sup> mice and were unstimulated or stimulated with ConA. At the times indicated, real-time RT-PCR was performed for the cytokines denoted and results were normalized to  $\beta$ -actin. The Sec13<sup>H/-</sup> mRNA levels relative to the Sec13<sup>+/+</sup> mice per time point is displayed +/- standard deviation. Data represent at least 3 mice per group.

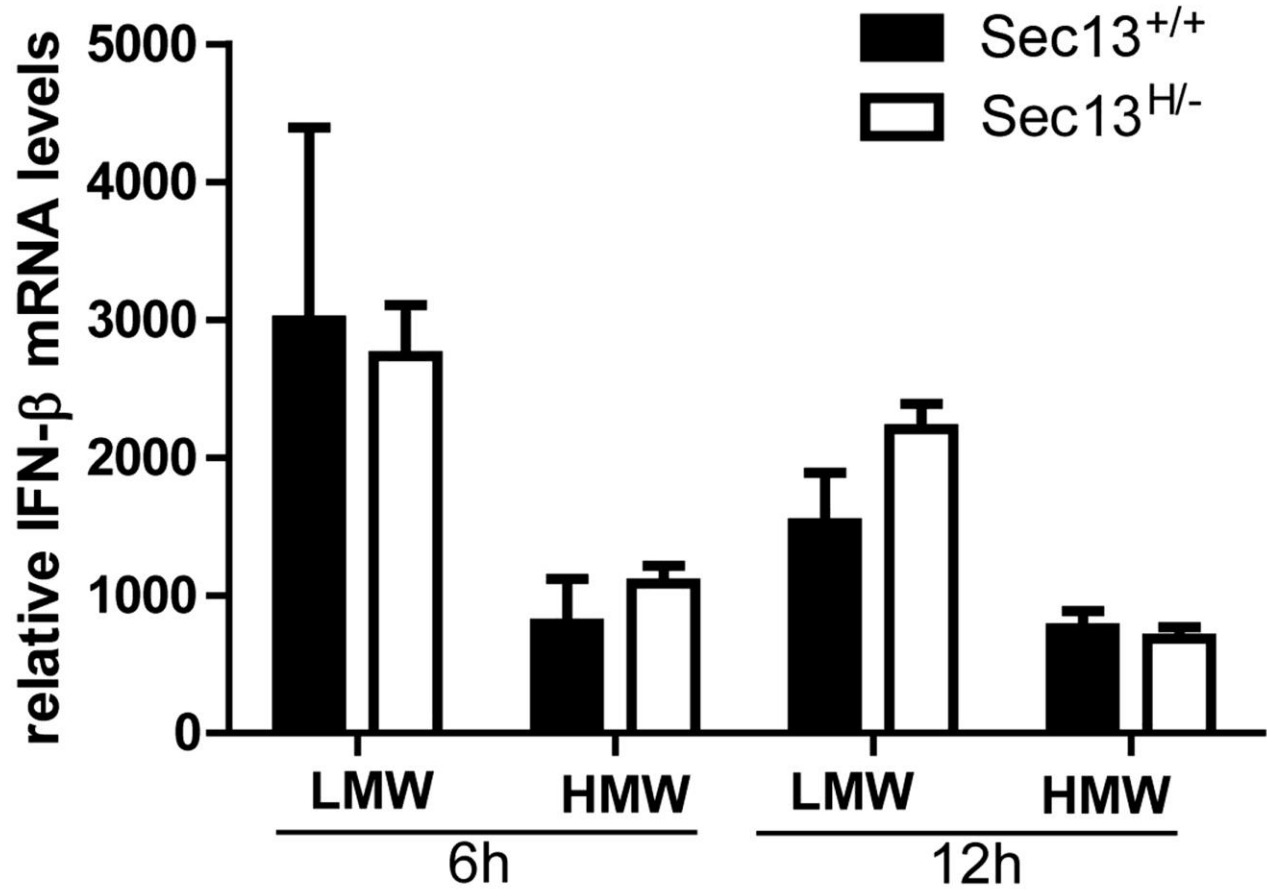

**Supplementary Figure 4. Interferon-β Expression Is Not Altered in Sec13<sup>H/-</sup> mice.** Lung fibroblasts from Sec13<sup>+/+</sup> or Sec13<sup>H/-</sup> mice were transfected with 1ug/ml of low molecular weight (LMW) or high molecular weight (HMW) poly (I:C) as indicated. After 6h, RNA was harvested and IFN-β mRNA levels were measured by RT-qPCR. The expression levels were normalized to β-actin.
